# Supplementary material
Source: PubMed Central journal article supplement (PMC3978302)

Figure S1

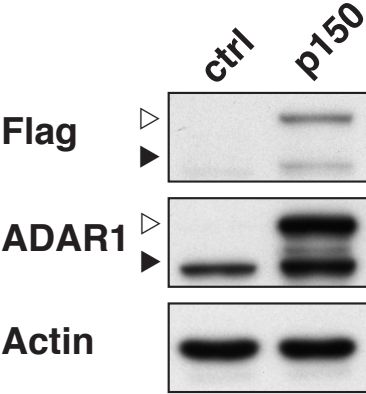

Figure S2

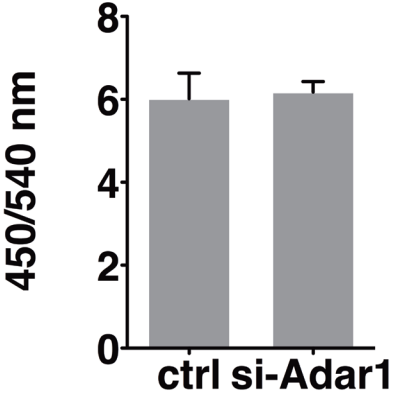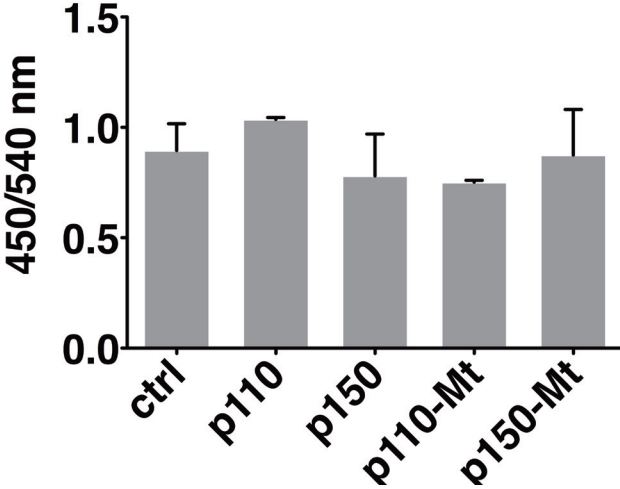

Figure S3

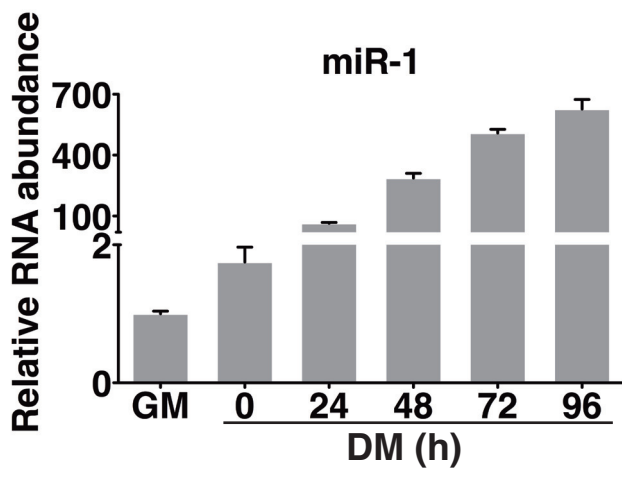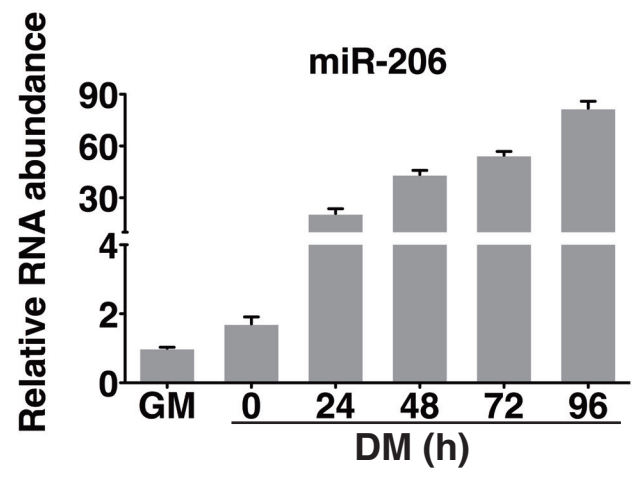

Figure S4

a

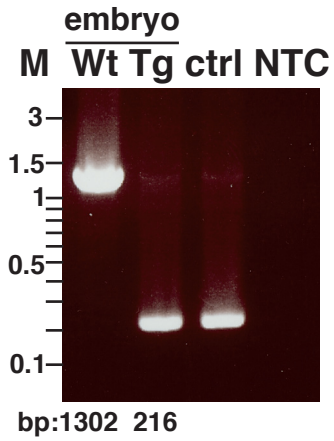

b

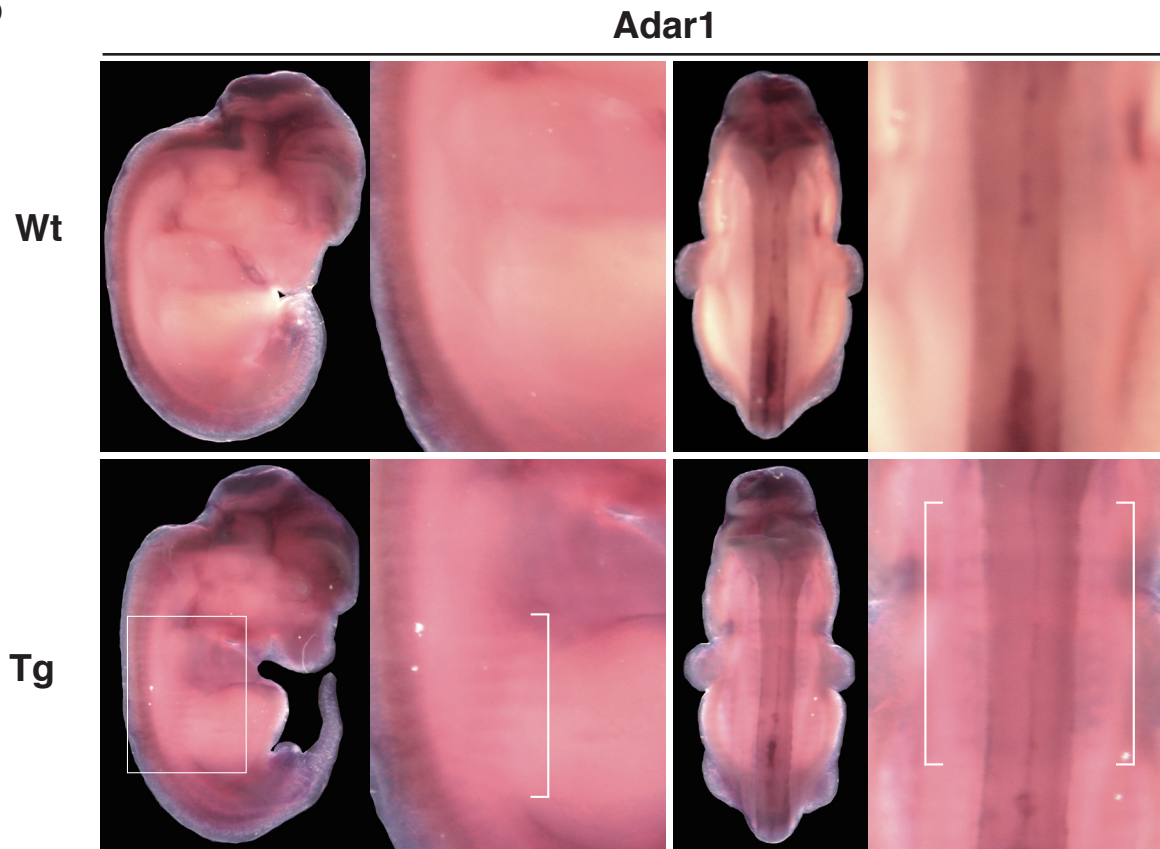

c

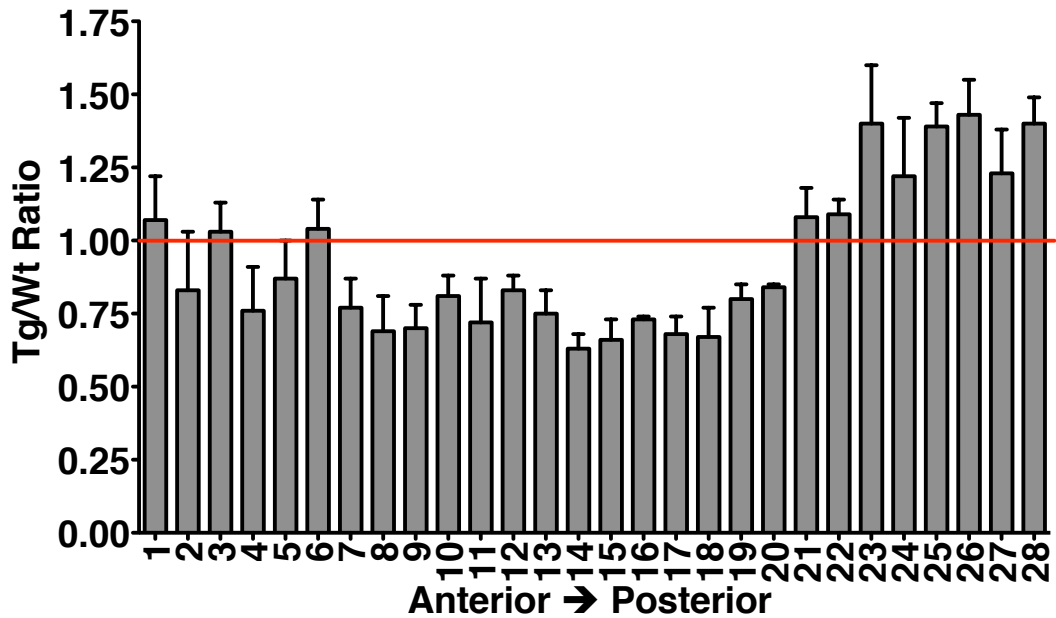

Figure S5

a

p-value (-log10)

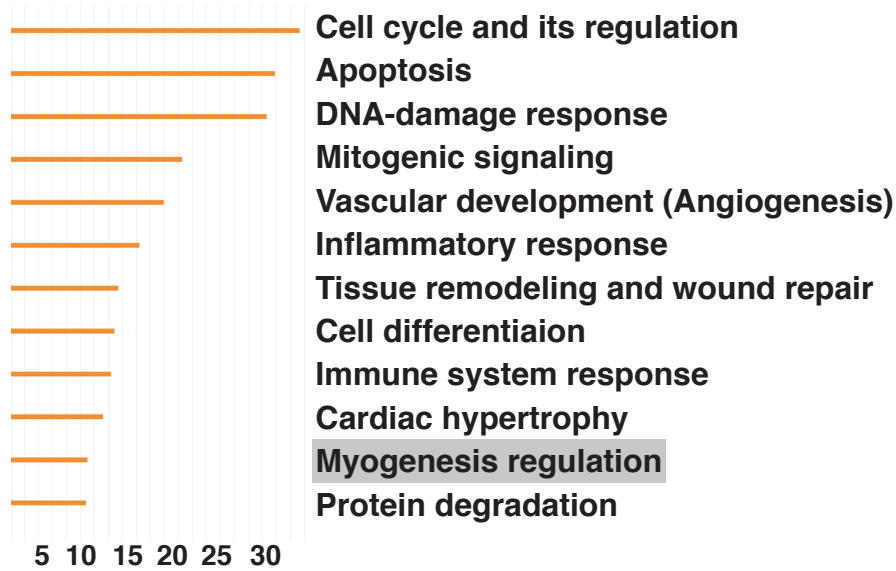

b

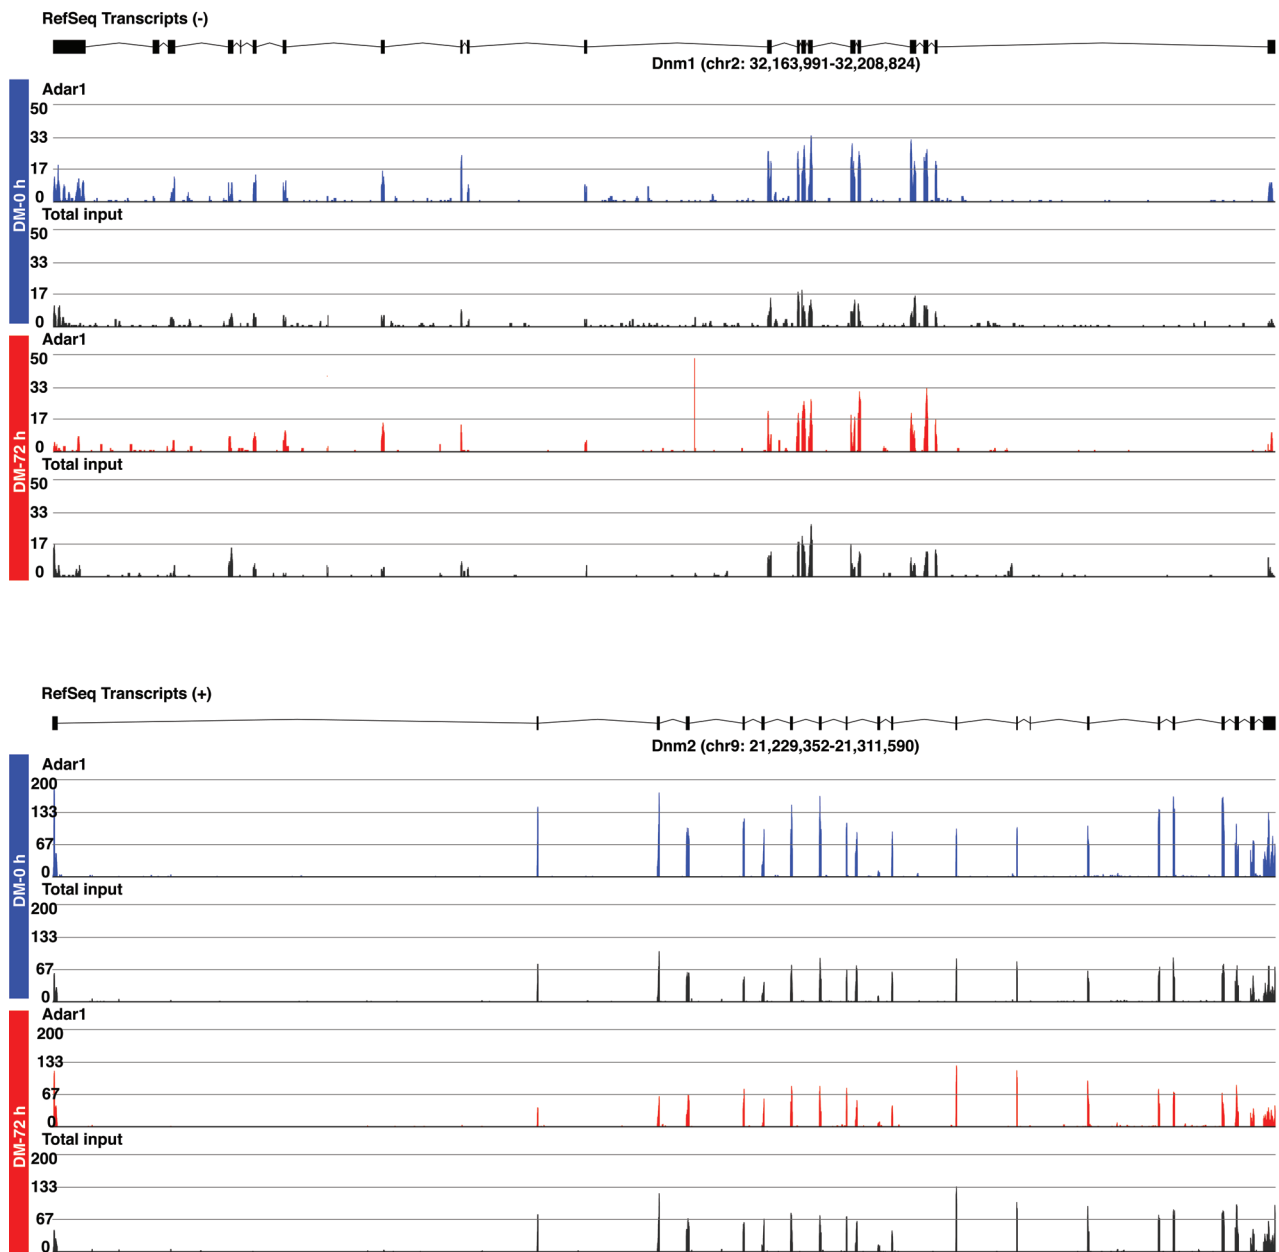

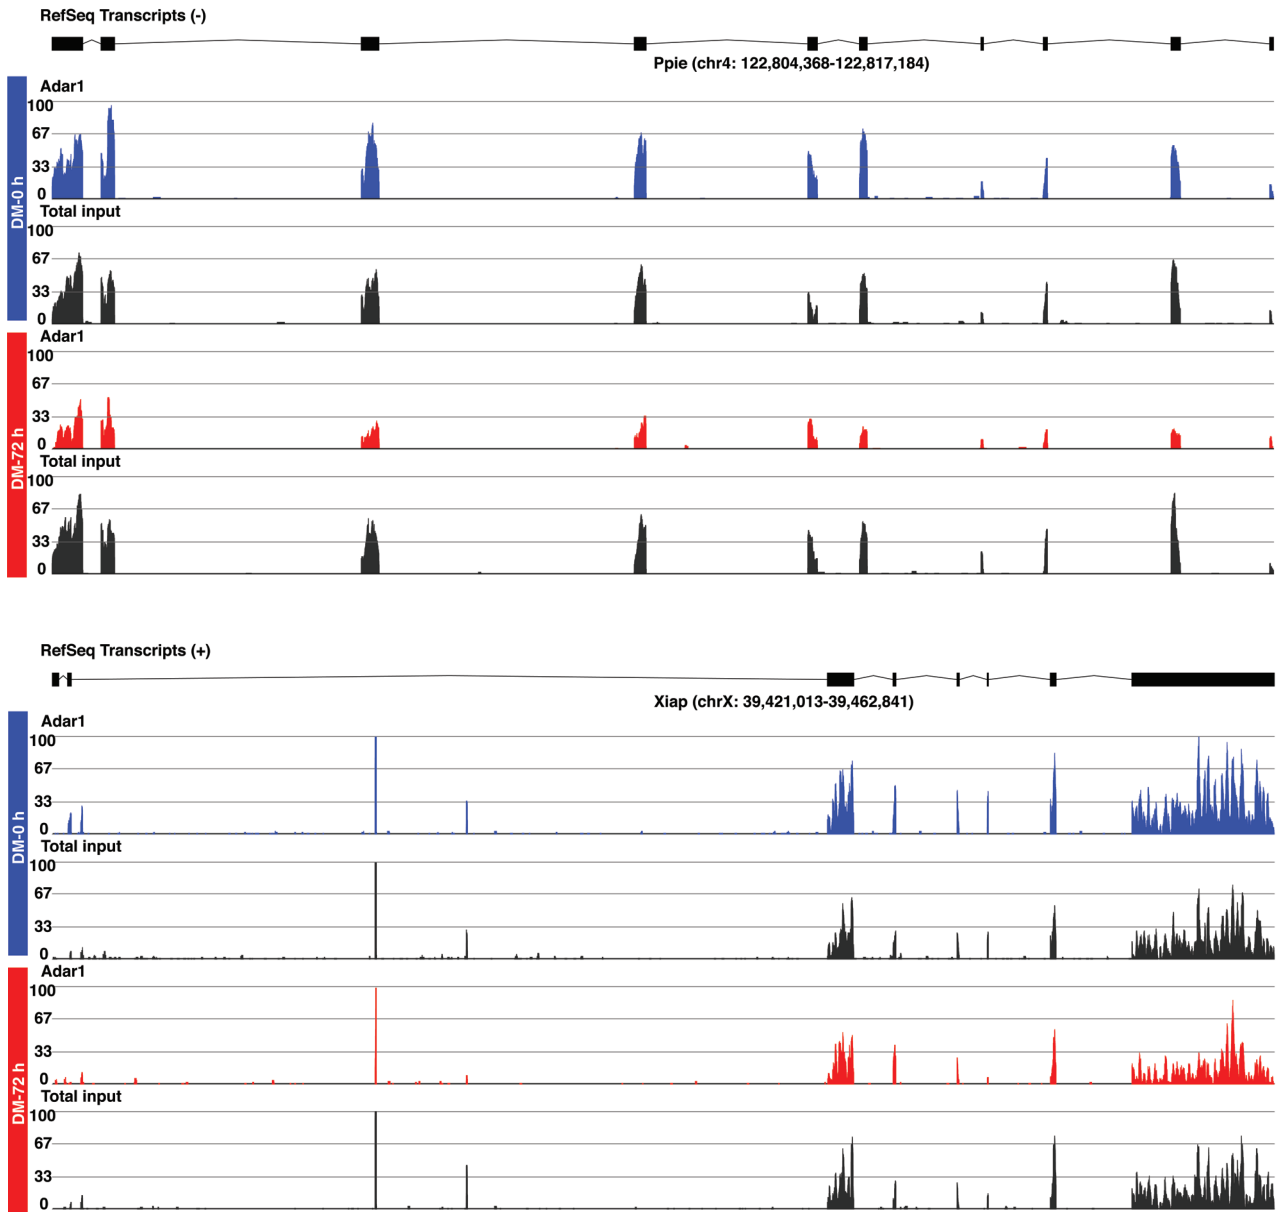

C

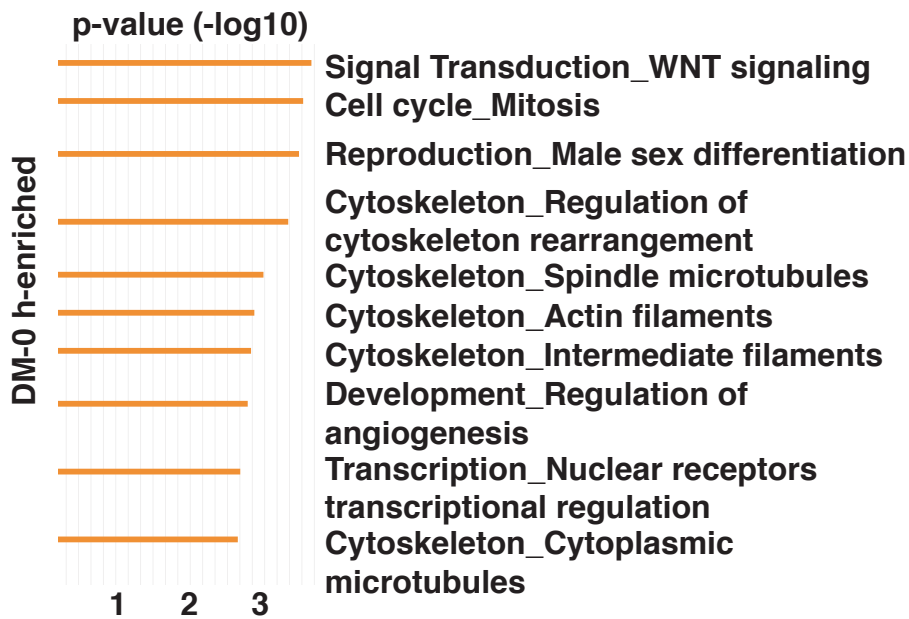

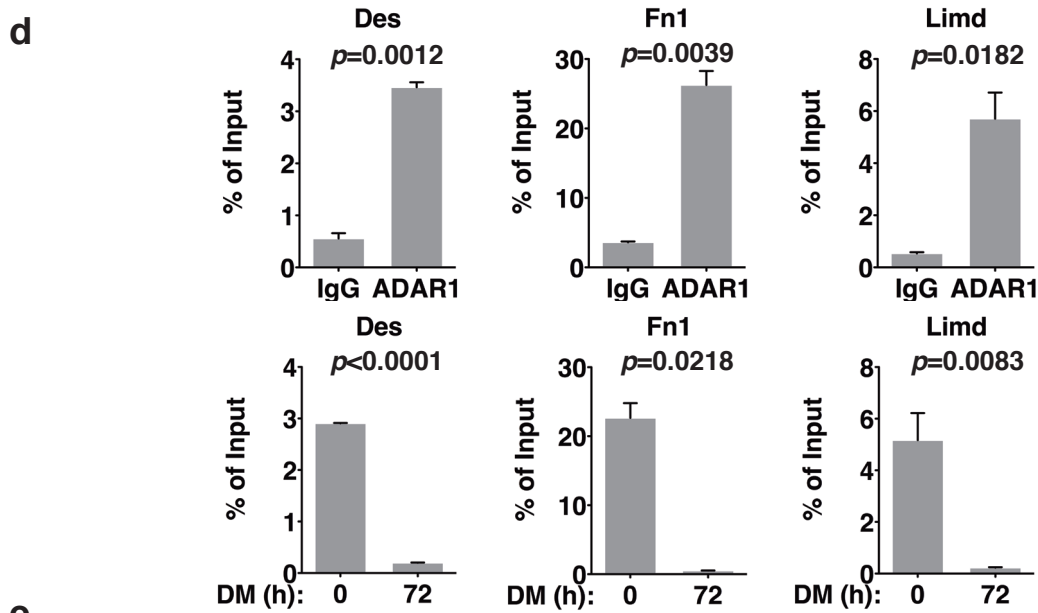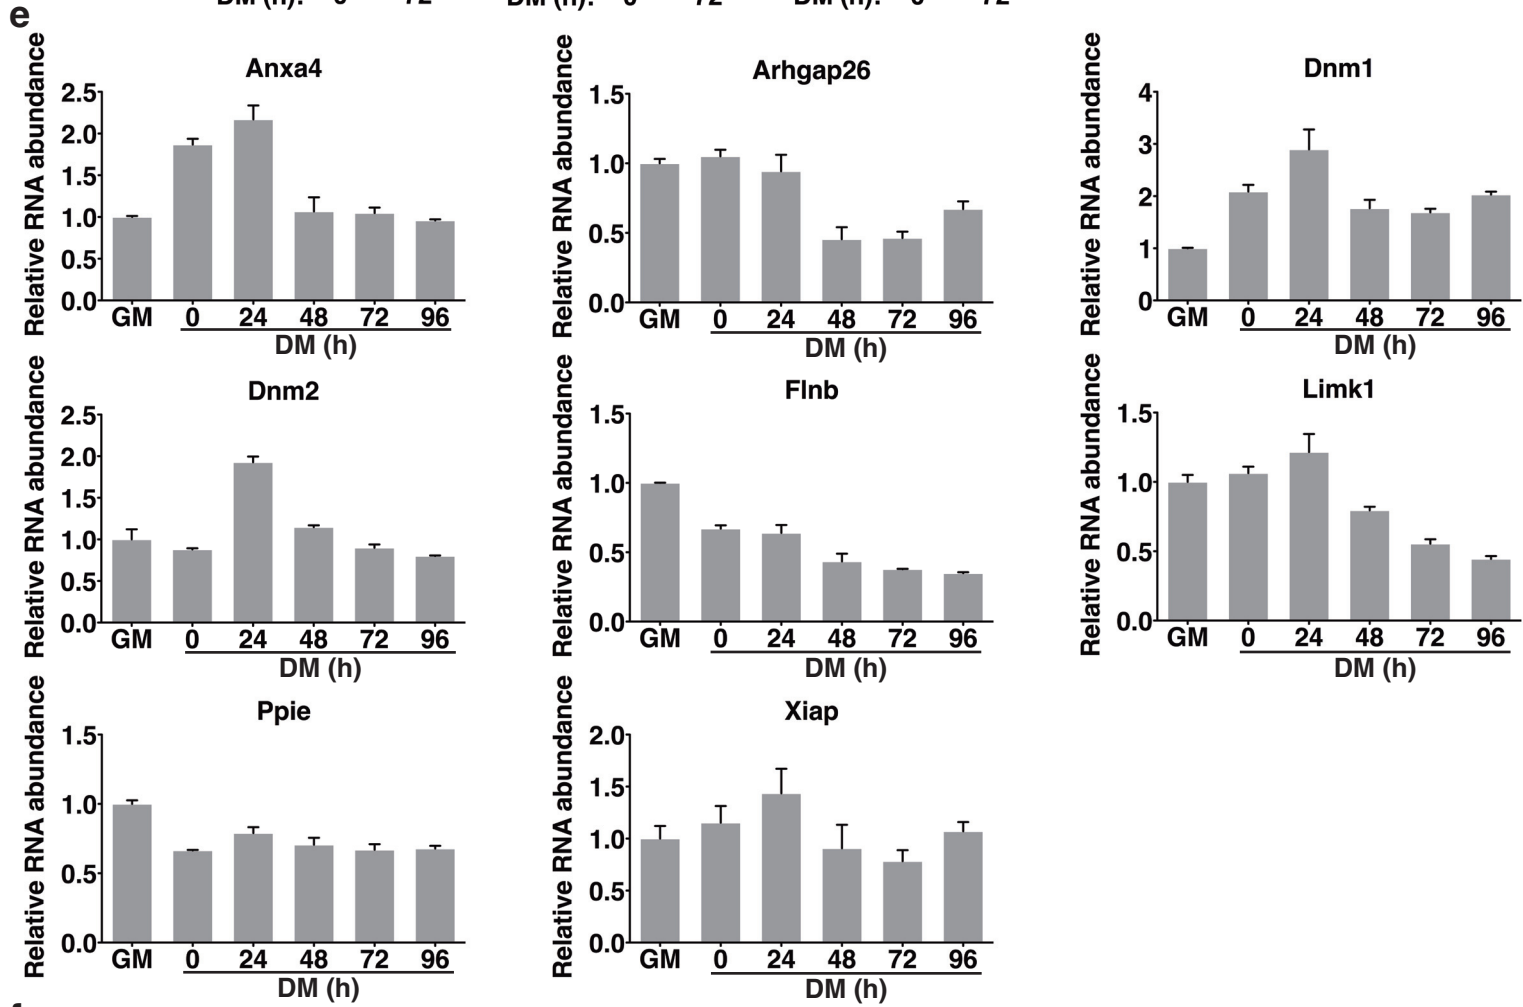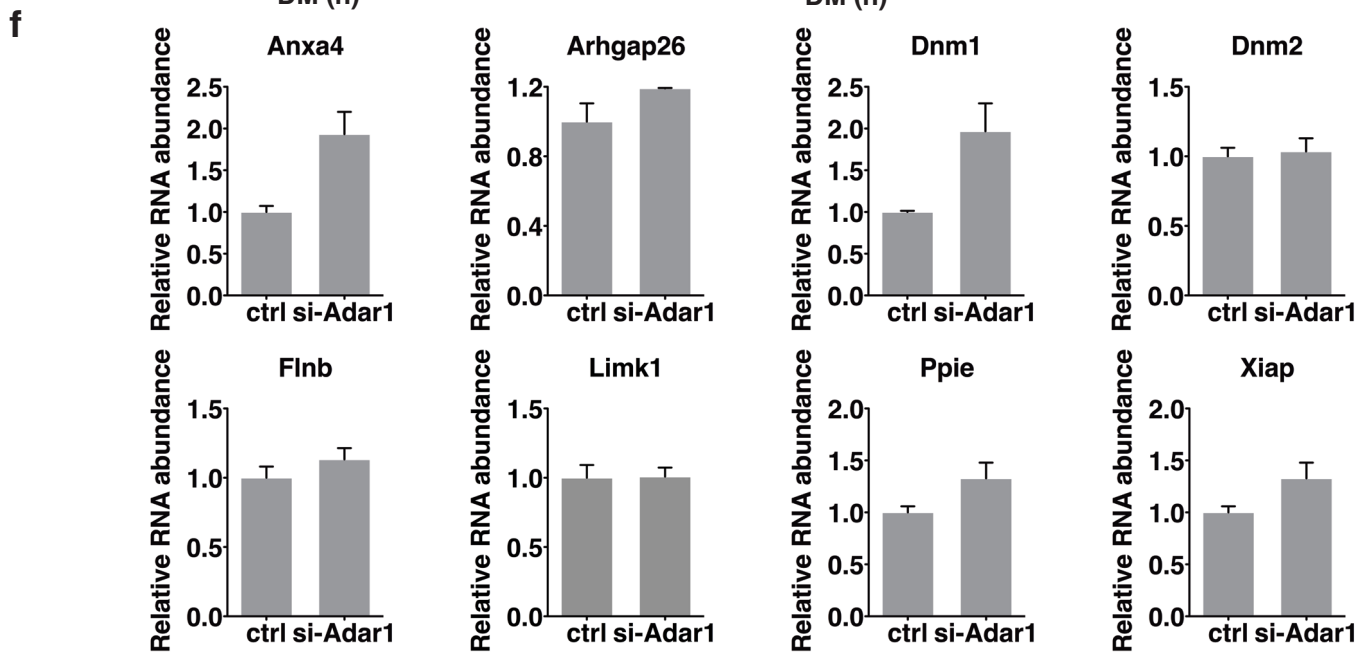

**Figure S6**

**Dnm1**

**DM-0 hr**

**32169442**

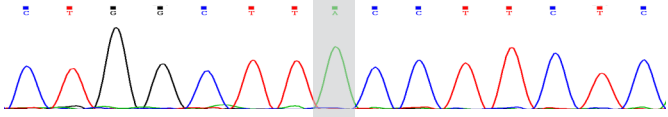

**DM-72 hr**

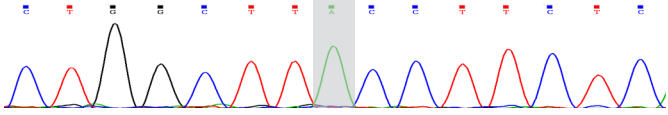

**DM-0 hr**

**32169653**

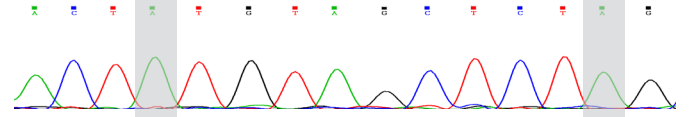

**DM-72 hr**

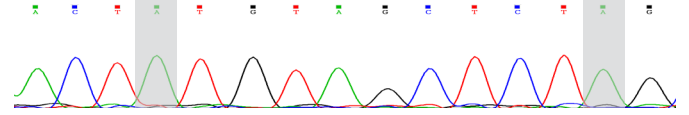

**Dnm2**

**DM-0 hr**

**21289036**

**21289046**

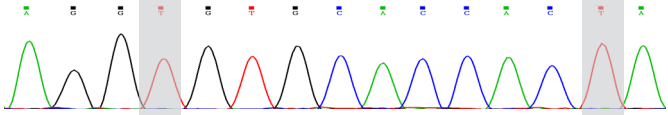

**DM-72 hr**

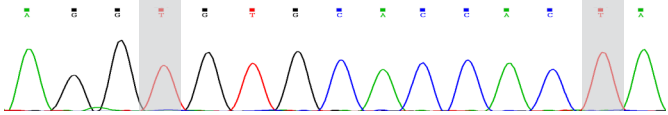

**DM-0 hr**

**21297898**

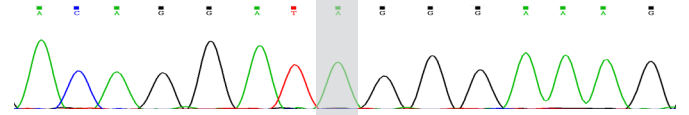

**DM-72 hr**

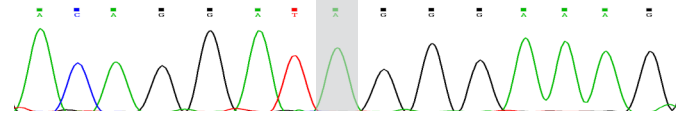

Supplement: cdd2013197x1.pdf [file cdd2013197x1.pdf]
